# Supplementary material for: Marked irregular myofiber shape is a hallmark of human skeletal muscle ageing and is reversed by heavy resistance training
Source: PubMed Central journal article supplement (PMC10834339; doi:10.1002/jcsm.13405), 2023-12-20

# SM 1

|                                        | Young women (12) |             |    | Old women (13)   |             |    | Oldest Old women (22) |             |    |
|----------------------------------------|------------------|-------------|----|------------------|-------------|----|-----------------------|-------------|----|
|                                        | Average $\pm$ SD | Min - Max   | n  | Average $\pm$ SD | Min - Max   | n  | Average $\pm$ SD      | Min - Max   | n  |
| Age (y.)                               | 23 $\pm$ 3       | 20 - 28     | 12 | 74 $\pm$ 3       | 71 - 78     | 13 | 87 $\pm$ 3            | 83 - 97     | 22 |
| Height (m.)                            | 1.68 $\pm$ 0.07  | 1.57 - 1.77 | 12 | 1.67 $\pm$ 0.03  | 1.62 - 1.74 | 13 | 1.59 $\pm$ 0.08       | 1.42 - 1.76 | 13 |
| Weight (kg.)                           | 64 $\pm$ 8       | 53 - 75     | 12 | 67 $\pm$ 9       | 57 - 84     | 13 | 57 $\pm$ 10           | 45 - 76     | 13 |
| BMI (kg/m <sup>2</sup> )               | 22.7 $\pm$ 2.0   | 19.0 - 25.5 | 12 | 24.2 $\pm$ 3.8   | 19.9 - 30.4 | 13 | 22.3 $\pm$ 2.9        | 18.7 - 26.2 | 13 |
| LBM <sub>leg</sub> (kg.)               |                  | N/A         |    | 13 $\pm$ 1       | 12 - 13     | 2  | 12 $\pm$ 2            | 9 - 17      | 12 |
| CSA <sub>quad</sub> (cm <sup>2</sup> ) |                  | N/A         |    |                  | N/A         |    | 35 $\pm$ 8            | 26 - 48     | 10 |
| Isometric MVC (Nm)                     |                  | N/A         |    |                  | N/A         |    | 80 $\pm$ 31           | 22 - 140    | 10 |
| Isokinetic MVC (Nm)                    |                  | N/A         |    |                  | N/A         |    | 58 $\pm$ 19           | 18 - 91     | 10 |
|                                        | Young men (22)   |             |    | Old men (98)     |             |    | Oldest Old men (30)   |             |    |
|                                        | Average $\pm$ SD | Min - Max   | n  | Average $\pm$ SD | Min - Max   | n  | Average $\pm$ SD      | Min - Max   | n  |
| Age (y.)                               | 26 $\pm$ 5       | 20 - 36     | 22 | 71 $\pm$ 4       | 60 - 79     | 98 | 86 $\pm$ 3            | 81 - 93     | 30 |
| Height (m.)                            | 1.81 $\pm$ 0.08  | 1.68 - 1.93 | 22 | 1.78 $\pm$ 0.07  | 1.55 - 1.95 | 98 | 1.76 $\pm$ 0.07       | 1.60 - 1.88 | 27 |
| Weight (kg.)                           | 82 $\pm$ 15      | 62 - 111    | 22 | 82 $\pm$ 12      | 56 - 109    | 98 | 79 $\pm$ 9            | 65 - 98     | 27 |
| BMI (kg/m <sup>2</sup> )               | 24.6 $\pm$ 3.3   | 20.1 - 30.4 | 22 | 25.9 $\pm$ 3.2   | 18.9 - 32.5 | 98 | 25.6 $\pm$ 3.0        | 20.7 - 33.2 | 27 |
| LBM <sub>leg</sub> (kg.)               | 22 $\pm$ 4       | 17 - 30     | 22 | 20 $\pm$ 3       | 13 - 26     | 51 | 18 $\pm$ 2            | 15 - 21     | 21 |
| CSA <sub>quad</sub> (cm <sup>2</sup> ) | 73 $\pm$ 15      | 55 - 99     | 7  | 62 $\pm$ 12      | 36 - 91     | 65 | 50 $\pm$ 8            | 37 - 69     | 22 |
| Isometric MVC (Nm)                     | 272 $\pm$ 62     | 186 - 364   | 22 | 188 $\pm$ 38     | 85 - 278    | 93 | 145 $\pm$ 30          | 75 - 205    | 24 |
| Isokinetic MVC (Nm)                    | 307 $\pm$ 67     | 200 - 425   | 22 | 207 $\pm$ 46     | 75 - 313    | 94 | 130 $\pm$ 34          | 40 - 219    | 25 |

# SM 2

| <b>Soendenbroe et al., 2022 (n=46)</b>    |             |    |      |                     |             |    |      |      |
|-------------------------------------------|-------------|----|------|---------------------|-------------|----|------|------|
| <b>Old (n=31)</b>                         |             |    |      | <b>Young (n=15)</b> |             |    |      |      |
|                                           | Average     | SD | Min  | Max                 | Average     | SD | Min  | Max  |
| Age (yrs)                                 | 73 ± 4      |    | 68   | 82                  | 26 ± 5      |    | 20   | 36   |
| Height (m)                                | 1.77 ± 0.07 |    | 1.61 | 1.95                | 1.83 ± 0.07 |    | 1.69 | 1.93 |
| Weight (kg)                               | 79 ± 10     |    | 63   | 109                 | 82 ± 13     |    | 62   | 105  |
| BMI (kg/m <sup>2</sup> )                  | 25.1 ± 3.3  |    | 20.5 | 32.4                | 24.5 ± 3.0  |    | 20.3 | 29.7 |
| LBM <sub>leg</sub> (kg)                   | 20 ± 2      |    | 17   | 26                  | 23 ± 3      |    | 18   | 27   |
| Isometric MVC (Nm)                        | 186 ± 38    |    | 118  | 278                 | 285 ± 66    |    | 186  | 364  |
| Isokinetic MVC (Nm)                       | 197 ± 45    |    | 123  | 313                 | 318 ± 74    |    | 200  | 425  |
| <b>Karlsen et al., 2020a (n=26)</b>       |             |    |      |                     |             |    |      |      |
| <b>Old (n=19)</b>                         |             |    |      | <b>Young (n=7)</b>  |             |    |      |      |
|                                           | Average     | SD | Min  | Max                 | Average     | SD | Min  | Max  |
| Age (yrs)                                 | 67 ± 4      |    | 60   | 73                  | 25 ± 3      |    | 20   | 31   |
| Height (m)                                | 1.81 ± 0.07 |    | 1.68 | 1.94                | 1.79 ± 0.08 |    | 1.68 | 1.91 |
| Weight (kg)                               | 85 ± 14     |    | 60   | 108                 | 81 ± 19     |    | 62   | 111  |
| BMI (kg/m <sup>2</sup> )                  | 25.9 ± 3.6  |    | 18.9 | 32.5                | 25.0 ± 4.2  |    | 20.1 | 30.4 |
| LBM <sub>leg</sub> (kg)                   | 20 ± 3      |    | 15   | 26                  | 21 ± 5      |    | 17   | 30   |
| CSA <sub>quad</sub> (cm <sup>2</sup> )    | 58 ± 11     |    | 36   | 82                  | 73 ± 15     |    | 55   | 99   |
| Isometric MVC (Nm)                        | 200 ± 36    |    | 130  | 257                 | 244 ± 45    |    | 203  | 334  |
| Isokinetic MVC (Nm)                       | 230 ± 42    |    | 143  | 295                 | 284 ± 44    |    | 230  | 358  |
| <b>Heisterberg et al., 2018 (n=52)</b>    |             |    |      |                     |             |    |      |      |
|                                           | Average     | SD | Min  | Max                 |             |    |      |      |
| Age (yrs)                                 | 72 ± 5      |    | 65   | 85                  |             |    |      |      |
| Height (m)                                | 1.78 ± 0.07 |    | 1.61 | 1.90                |             |    |      |      |
| Weight (kg)                               | 84 ± 11     |    | 57   | 108                 |             |    |      |      |
| BMI (kg/m <sup>2</sup> )                  | 26.5 ± 3.0  |    | 19.2 | 33.2                |             |    |      |      |
| CSA <sub>quad</sub> (cm <sup>2</sup> )    | 62 ± 11     |    | 37   | 91                  |             |    |      |      |
| Isometric MVC (Nm)                        | 177 ± 38    |    | 85   | 256                 |             |    |      |      |
| Isokinetic MVC (Nm)                       | 197 ± 47    |    | 75   | 298                 |             |    |      |      |
| <b>Bechshøft et al., 2019 (n=23)</b>      |             |    |      |                     |             |    |      |      |
| <b>Old (n=11)</b>                         |             |    |      | <b>Young (n=12)</b> |             |    |      |      |
|                                           | Average     | SD | Min  | Max                 | Average     | SD | Min  | Max  |
| Age (yrs)                                 | 74 ± 3      |    | 71   | 78                  | 23 ± 3      |    | 20   | 28   |
| Height (m)                                | 1.66 ± 0.03 |    | 1.62 | 1.69                | 1.68 ± 0.07 |    | 1.57 | 1.77 |
| Weight (kg)                               | 69 ± 10     |    | 57   | 84                  | 64 ± 8      |    | 53   | 75   |
| BMI (kg/m <sup>2</sup> )                  | 25.0 ± 3.6  |    | 20.3 | 30.4                | 22.7 ± 2.0  |    | 19.0 | 25.5 |
| <b>Bechshøft et al., 2017 (n=29)</b>      |             |    |      |                     |             |    |      |      |
|                                           | Average     | SD | Min  | Max                 |             |    |      |      |
| Age (yrs)                                 | 87 ± 3      |    | 83   | 94                  |             |    |      |      |
| Height (m)                                | 1.69 ± 0.11 |    | 1.42 | 1.88                |             |    |      |      |
| Weight (kg)                               | 71 ± 13     |    | 45   | 98                  |             |    |      |      |
| BMI (kg/m <sup>2</sup> )                  | 24.7 ± 3.1  |    | 19.0 | 30.8                |             |    |      |      |
| LBM <sub>leg</sub> (kg)                   | 16 ± 3      |    | 9    | 21                  |             |    |      |      |
| CSA <sub>quad</sub> (cm <sup>2</sup> )    | 43 ± 10     |    | 26   | 69                  |             |    |      |      |
| Isometric MVC (Nm)                        | 120 ± 45    |    | 22   | 205                 |             |    |      |      |
| Isokinetic MVC (Nm)                       | 94 ± 37     |    | 18   | 148                 |             |    |      |      |
| <b>Karlsen et al., 2020b (n=9)</b>        |             |    |      |                     |             |    |      |      |
|                                           | Average     | SD | Min  | Max                 |             |    |      |      |
| Age (yrs)                                 | 77 ± 7      |    | 69   | 91                  |             |    |      |      |
| Height (m)                                | 1.70 ± 0.09 |    | 1.55 | 1.83                |             |    |      |      |
| Weight (kg)                               | 64 ± 11     |    | 48   | 85                  |             |    |      |      |
| BMI (kg/m <sup>2</sup> )                  | 22.2 ± 3.2  |    | 18.7 | 29.1                |             |    |      |      |
| LBM <sub>leg</sub> (kg)                   | 13 ± 2      |    | 10   | 15                  |             |    |      |      |
| <b>Kryger &amp; Andersen, 2007 (n=12)</b> |             |    |      |                     |             |    |      |      |
|                                           | Average     | SD | Min  | Max                 |             |    |      |      |
| Age (yrs)                                 | 88 ± 3      |    | 85   | 97                  |             |    |      |      |

# SM 3

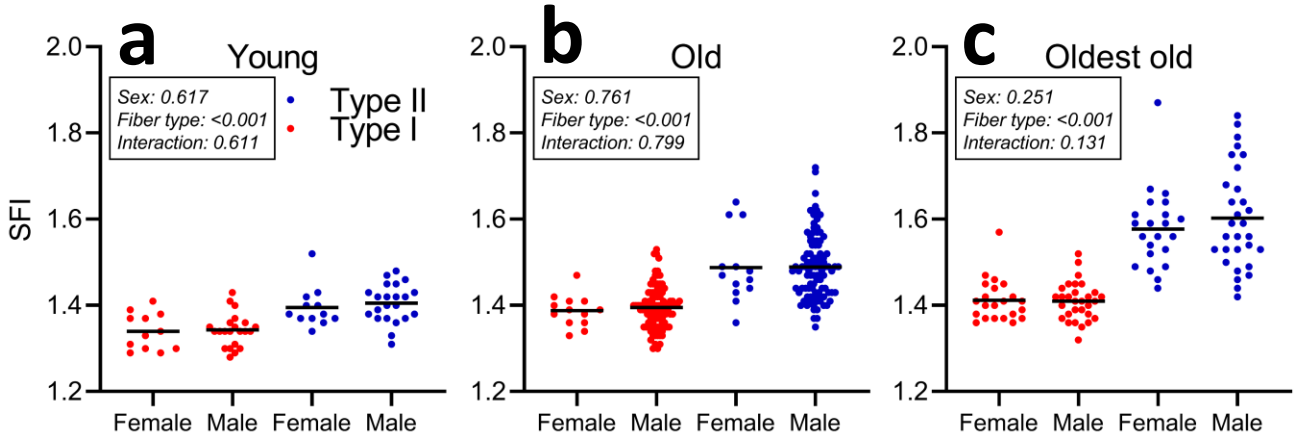

# SM 4

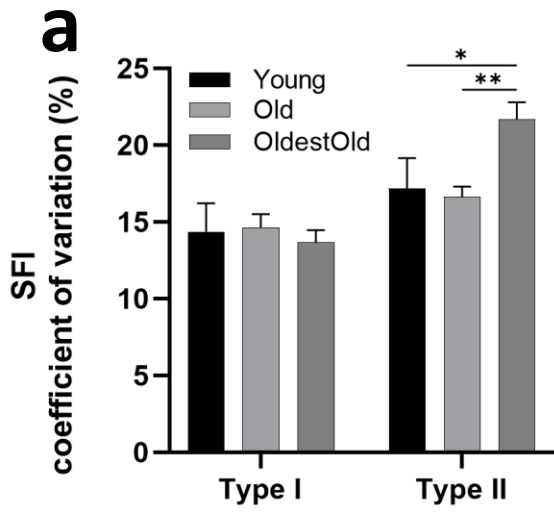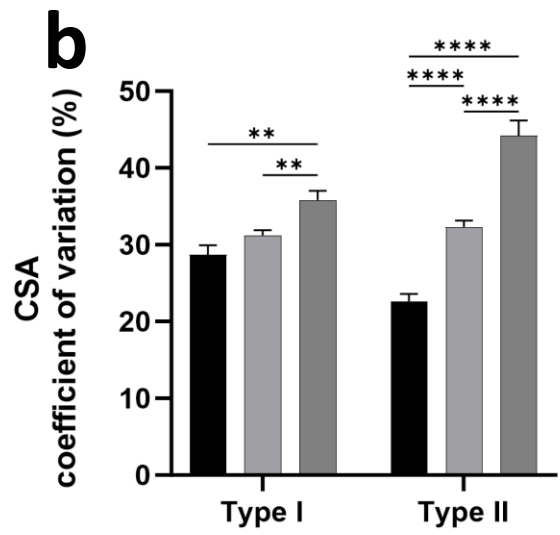

# SM 5

Young

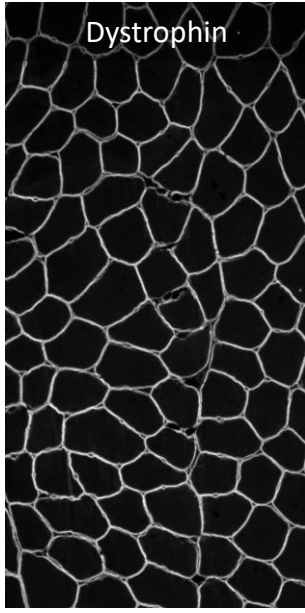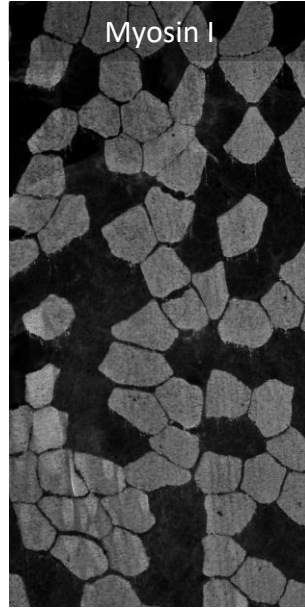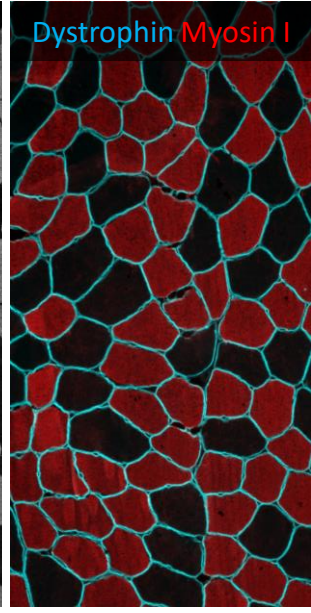

Old

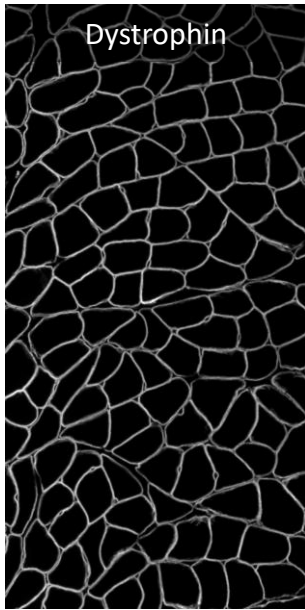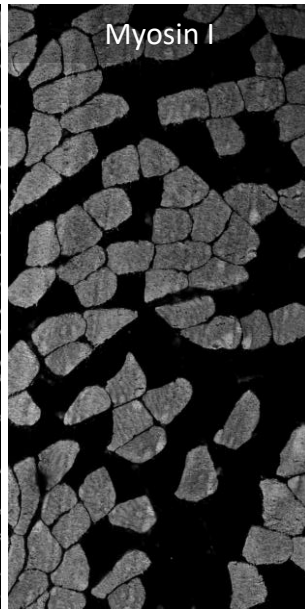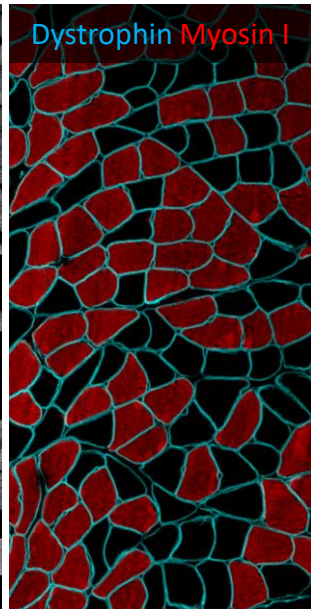

Oldest Old

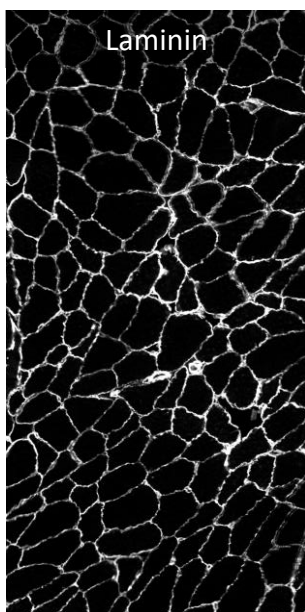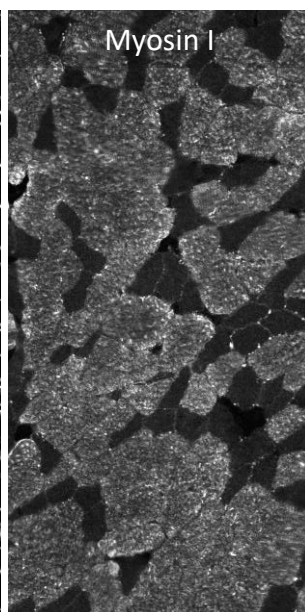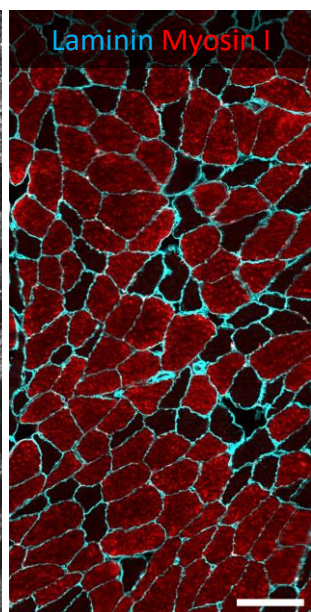

# SM 6

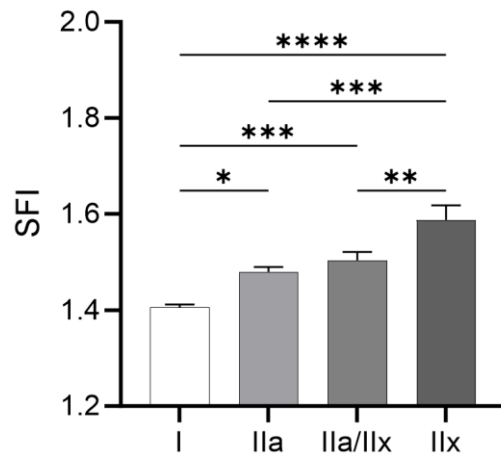

# SM 7

**a**

|         |           | Number of subjects in each SFI increment |     |            | Number of myofibers in each SFI increment |      |            |
|---------|-----------|------------------------------------------|-----|------------|-------------------------------------------|------|------------|
|         |           | Young                                    | Old | Oldest Old | Young                                     | Old  | Oldest Old |
| Type I  | <.1.10    | 1                                        | 1   | 1          | 1                                         | 1    | 1          |
|         | 1.10-1.20 | 34                                       | 99  | 49         | 497                                       | 992  | 316        |
|         | 1.20-1.30 | 34                                       | 111 | 52         | 2859                                      | 5916 | 2264       |
|         | 1.30-1.40 | 34                                       | 111 | 52         | 2134                                      | 6041 | 2663       |
|         | 1.40-1.50 | 34                                       | 111 | 52         | 984                                       | 3576 | 1760       |
|         | 1.50-1.60 | 34                                       | 107 | 51         | 421                                       | 1845 | 977        |
|         | 1.60-1.70 | 30                                       | 101 | 52         | 144                                       | 946  | 505        |
|         | 1.70-1.80 | 21                                       | 93  | 45         | 85                                        | 464  | 290        |
|         | 1.80-1.90 | 14                                       | 76  | 41         | 33                                        | 253  | 161        |
|         | 1.90-2.00 | 7                                        | 56  | 34         | 10                                        | 128  | 103        |
|         | >2.00     | 16                                       | 67  | 40         | 35                                        | 233  | 184        |
| Type II | <.1.10    | 0                                        | 0   | 1          | 0                                         | 0    | 1          |
|         | 1.10-1.20 | 29                                       | 79  | 34         | 191                                       | 410  | 142        |
|         | 1.20-1.30 | 34                                       | 111 | 52         | 1980                                      | 2924 | 1012       |
|         | 1.30-1.40 | 34                                       | 111 | 52         | 2310                                      | 4303 | 1705       |
|         | 1.40-1.50 | 34                                       | 111 | 52         | 1326                                      | 3266 | 1495       |
|         | 1.50-1.60 | 34                                       | 111 | 52         | 673                                       | 2272 | 1154       |
|         | 1.60-1.70 | 33                                       | 108 | 52         | 306                                       | 1287 | 774        |
|         | 1.70-1.80 | 31                                       | 104 | 51         | 161                                       | 912  | 512        |
|         | 1.80-1.90 | 27                                       | 96  | 50         | 75                                        | 537  | 385        |
|         | 1.90-2.00 | 15                                       | 88  | 51         | 28                                        | 336  | 238        |
|         | >2.00     | 26                                       | 95  | 51         | 68                                        | 776  | 757        |

**b**

|           |           | Number of subjects in each CSA increment |     |            | Number of myofibers in each CSA increment |      |            |
|-----------|-----------|------------------------------------------|-----|------------|-------------------------------------------|------|------------|
|           |           | Young                                    | Old | Oldest Old | Young                                     | Old  | Oldest Old |
| Type I    | 0-1000    | 10                                       | 37  | 31         | 73                                        | 188  | 178        |
|           | 1000-2000 | 23                                       | 78  | 49         | 423                                       | 1126 | 647        |
|           | 2000-3000 | 33                                       | 99  | 52         | 1256                                      | 3574 | 1447       |
|           | 3000-4000 | 34                                       | 110 | 51         | 1692                                      | 4641 | 2015       |
|           | 4000-5000 | 34                                       | 110 | 49         | 1526                                      | 4421 | 1812       |
|           | 5000-6000 | 31                                       | 109 | 45         | 1068                                      | 3187 | 1413       |
|           | >6000     | 29                                       | 103 | 41         | 1166                                      | 3407 | 1734       |
|           | Type II   | 0-1000                                   | 7   | 52         | 46                                        | 35   | 923        |
| 1000-2000 |           | 16                                       | 92  | 50         | 313                                       | 2803 | 2707       |
| 2000-3000 |           | 27                                       | 107 | 50         | 898                                       | 4548 | 1824       |
| 3000-4000 |           | 33                                       | 110 | 48         | 1447                                      | 4198 | 1048       |
| 4000-5000 |           | 33                                       | 105 | 41         | 1634                                      | 2418 | 517        |
| 5000-6000 |           | 29                                       | 96  | 27         | 1422                                      | 1132 | 234        |
| >6000     |           | 22                                       | 66  | 17         | 1371                                      | 1018 | 187        |

# SM 8

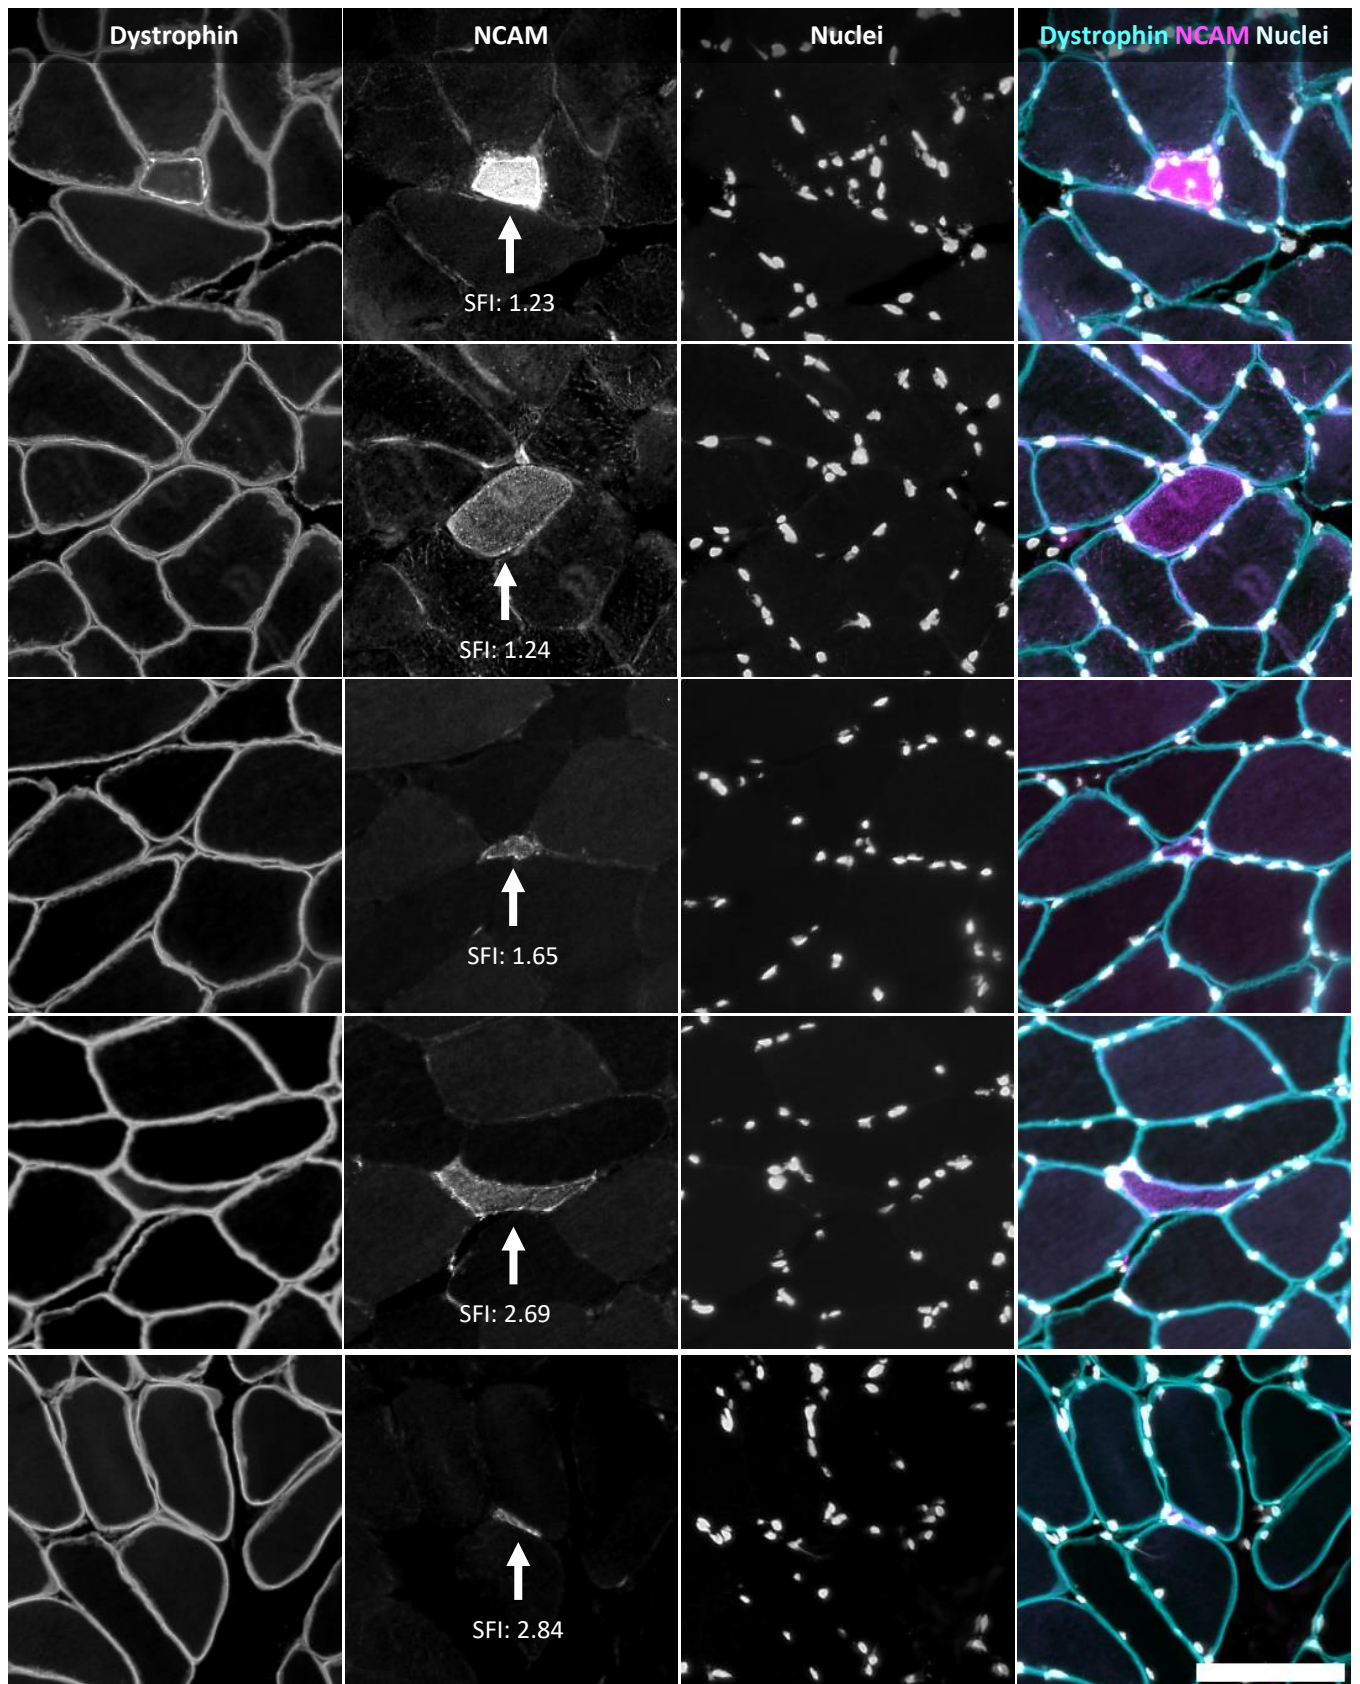



# SM 9

**a**

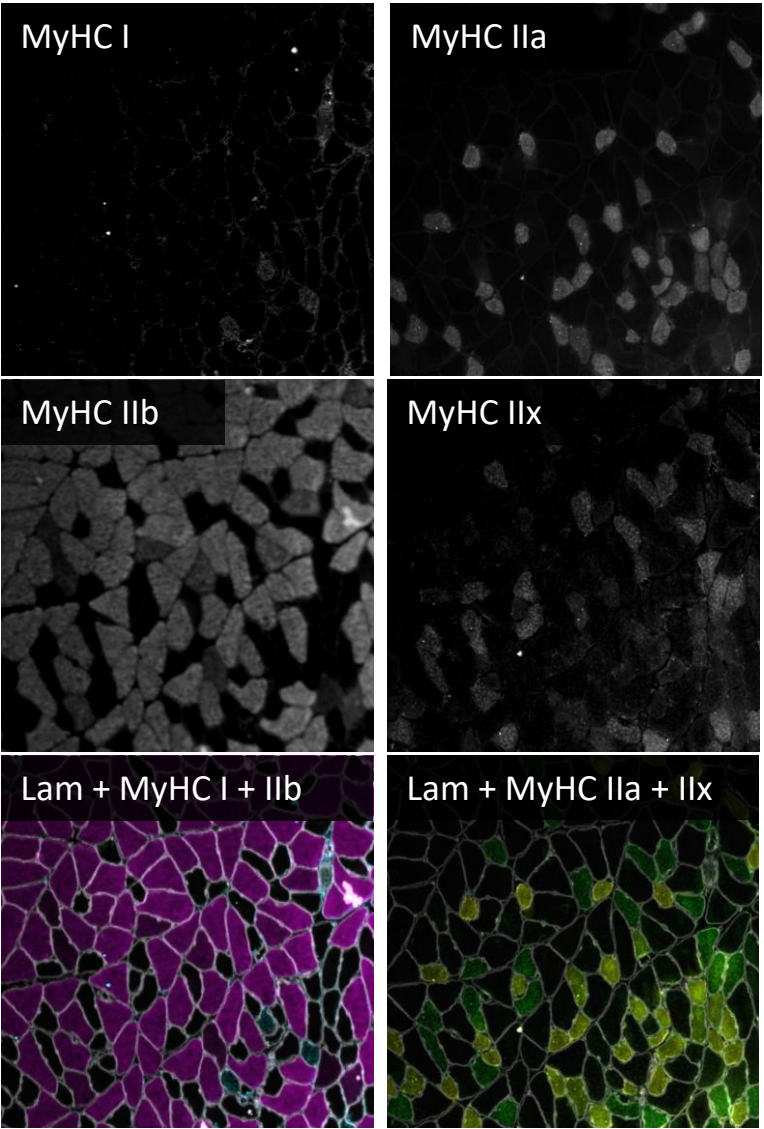

**b**

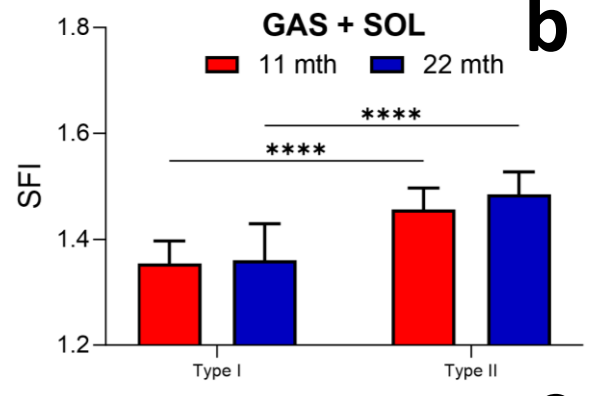

**c**

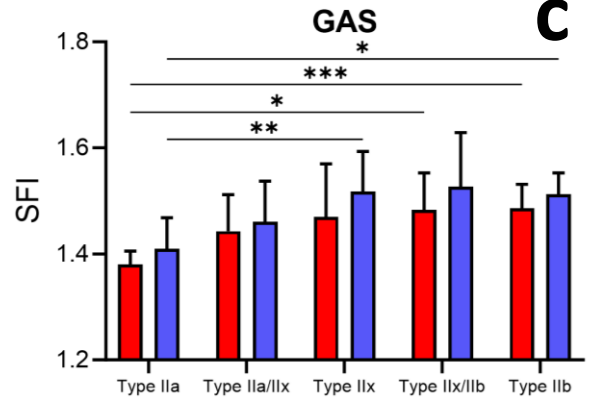

**d**

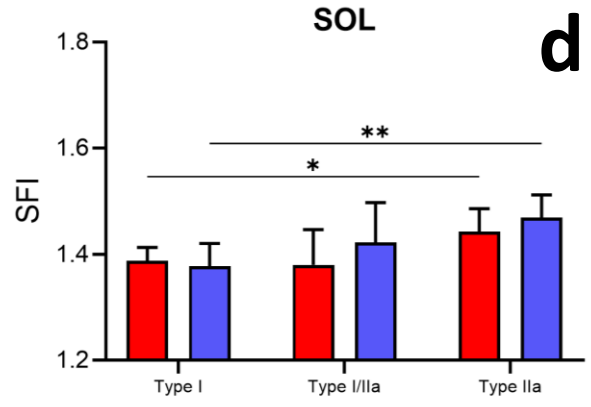

# SM 10

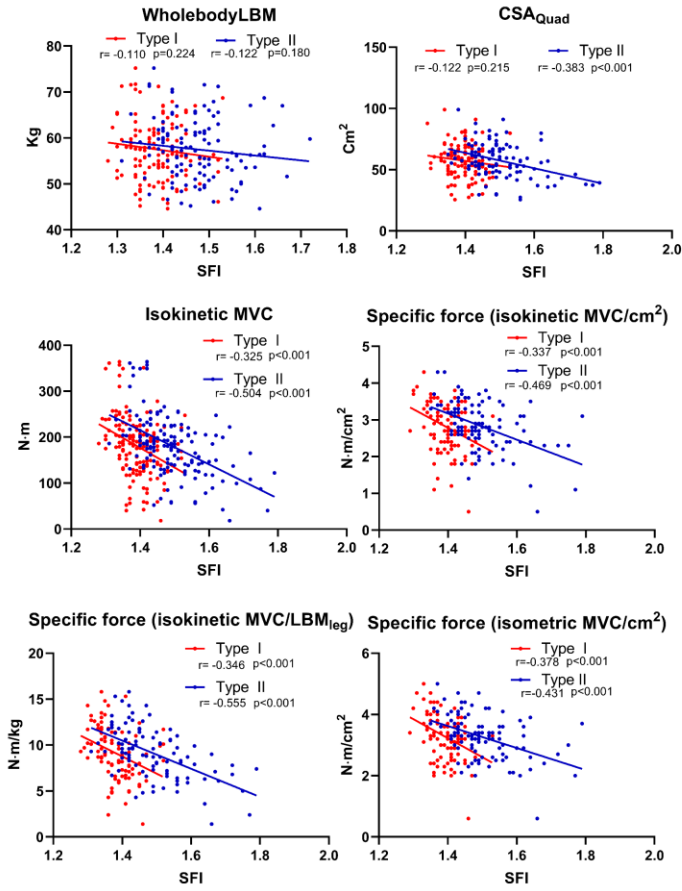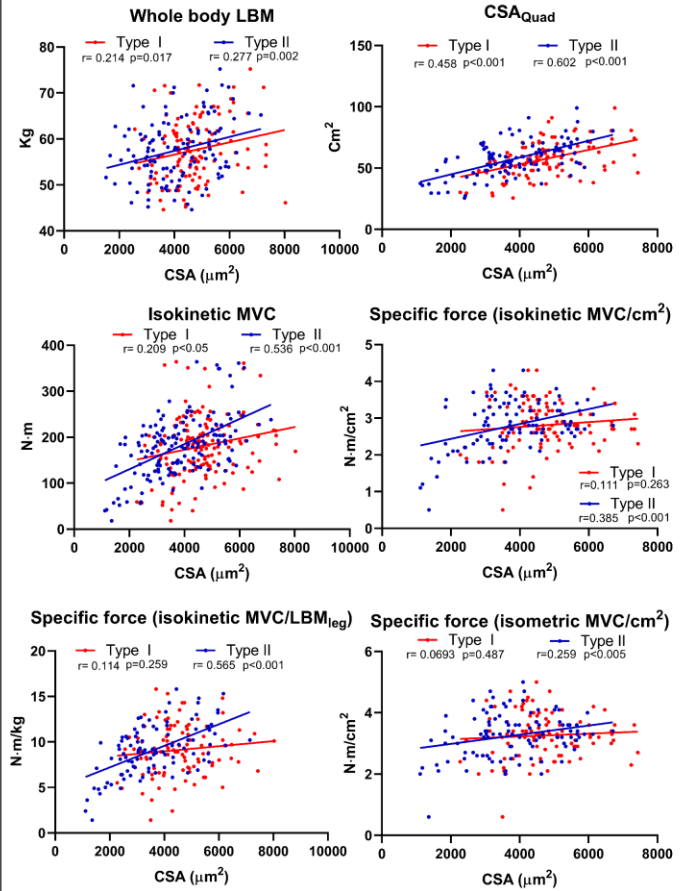

# SM 11

| <b>LBMleg</b>                                             |                    |           |                |                  |
|-----------------------------------------------------------|--------------------|-----------|----------------|------------------|
| <i>Resulting model: n=108, p&lt;0.0001, R Squared=41%</i> |                    |           |                |                  |
|                                                           | <b>Coefficient</b> | <b>SE</b> | <b>p-value</b> | <b>R Squared</b> |
| Intercept                                                 | 32,79              | 8,61      | 0,0002         |                  |
| Type I SFI                                                | -14,23             | 5,97      | 0,0190         | 0,032            |
| Type II CSA                                               | 0,002              | 0,0002    | <0,0001        | 0,272            |
| <b>Isometric MVC</b>                                      |                    |           |                |                  |
| <i>Resulting model: n=150, p&lt;0.0001, R Squared=58%</i> |                    |           |                |                  |
|                                                           | <b>Coefficient</b> | <b>SE</b> | <b>p-value</b> | <b>R Squared</b> |
| Intercept                                                 | 579,61             | 69,55     | <0,0001        |                  |
| Age                                                       | -2,25              | 0,25      | <0,0001        | 0,229            |
| Type II SFI                                               | -187,70            | 53,09     | 0,0005         | 0,036            |
| Type I CSA                                                | 0,01               | 0,004     | 0,0013         | 0,031            |
| <b>Isometric RFD</b>                                      |                    |           |                |                  |
| <i>Resulting model: n=123, p&lt;0.0001, R Squared=35%</i> |                    |           |                |                  |
|                                                           | <b>Coefficient</b> | <b>SE</b> | <b>p-value</b> | <b>R Squared</b> |
| Intercept                                                 | 2847,71            | 182,97    | <0,0001        |                  |
| Age                                                       | -22,23             | 2,78      | <0,0001        | 0,346            |
| <b>Specific force (isometric MVC/LBMleg)</b>              |                    |           |                |                  |
| <i>Resulting model: n=98, p&lt;0.0001, R Squared=57%</i>  |                    |           |                |                  |
|                                                           | <b>Coefficient</b> | <b>SE</b> | <b>p-value</b> | <b>R Squared</b> |
| Intercept                                                 | 23,99              | 3,23      | <0,0001        |                  |
| Age                                                       | -0,08              | 0,01      | <0,0001        | 0,270            |
| Type II SFI                                               | -5,49              | 2,40      | 0,0242         | 0,024            |
| <b>Whole body LBM</b>                                     |                    |           |                |                  |
| <i>Resulting model: n=123, p=0.0022, R Squared=8%</i>     |                    |           |                |                  |
|                                                           | <b>Coefficient</b> | <b>SE</b> | <b>p-value</b> | <b>R Squared</b> |
| Intercept                                                 | 51,26              | 2,08      | <0,0001        |                  |
| Type II CSA                                               | 0,002              | 0,0005    | 0,0022         | 0,075            |
| <b>CSAquad</b>                                            |                    |           |                |                  |
| <i>Resulting model: n=104, p&lt;0.0001, R Squared=55%</i> |                    |           |                |                  |
|                                                           | <b>Coefficient</b> | <b>SE</b> | <b>p-value</b> | <b>R Squared</b> |
| Intercept                                                 | 98,32              | 19,64     | <0,0001        |                  |
| Age                                                       | -0,26              | 0,08      | 0,0016         | 0,048            |
| Type II SFI                                               | -36,30             | 14,00     | 0,0110         | 0,030            |
| Type I CSA                                                | 0,004              | 0,001     | 0,0002         | 0,068            |
| Type II CSA                                               | 0,003              | 0,001     | 0,0081         | 0,033            |
| <b>Isokinetic MVC</b>                                     |                    |           |                |                  |
| <i>Resulting model: n=150, p&lt;0.0001, R Squared=57%</i> |                    |           |                |                  |
|                                                           | <b>Coefficient</b> | <b>SE</b> | <b>p-value</b> | <b>R Squared</b> |
| Intercept                                                 | 516,30             | 64,08     | <0,0001        |                  |
| Age                                                       | -2,04              | 0,23      | <0,0001        | 0,231            |
| Type II SFI                                               | -164,82            | 48,84     | 0,0009         | 0,034            |
| Type I CSA                                                | 0,01               | 0,003     | 0,0024         | 0,028            |
| <b>Specific force (isokinetic MVC/LBMleg)</b>             |                    |           |                |                  |
| <i>Resulting model: n=99, p&lt;0.0001, R Squared=57%</i>  |                    |           |                |                  |
|                                                           | <b>Coefficient</b> | <b>SE</b> | <b>p-value</b> | <b>R Squared</b> |
| Intercept                                                 | 22,13              | 3,06      | <0,0001        |                  |
| Age                                                       | -0,08              | 0,01      | <0,0001        | 0,264            |
| Type II SFI                                               | -5,33              | 2,27      | 0,0209         | 0,025            |
| <b>Specific force (isokinetic MVC/CSAquad)</b>            |                    |           |                |                  |
| <i>Resulting model: n=103, p&lt;0.0001, R Squared=34%</i> |                    |           |                |                  |
|                                                           | <b>Coefficient</b> | <b>SE</b> | <b>p-value</b> | <b>R Squared</b> |
| Intercept                                                 | 9,78               | 1,72      | <0,0001        |                  |
| Type I SFI                                                | -3,60              | 1,47      | 0,0164         | 0,040            |
| Type II SFI                                               | -1,79              | 0,80      | 0,0273         | 0,034            |
| Type II CSA                                               | 0,0002             | 0,00005   | 0,0002         | 0,100            |
| <b>Specific force (isometric MVC/CSAquad)</b>             |                    |           |                |                  |
| <i>Resulting model: n=103, p&lt;0.0001, R Squared=26%</i> |                    |           |                |                  |
|                                                           | <b>Coefficient</b> | <b>SE</b> | <b>p-value</b> | <b>R Squared</b> |
| Intercept                                                 | 7,79               | 1,11      | <0,0001        |                  |
| Age                                                       | -0,01              | 0,00      | 0,0031         | 0,068            |
| Type II SFI                                               | -2,33              | 0,83      | 0,0060         | 0,059            |

# SM 12

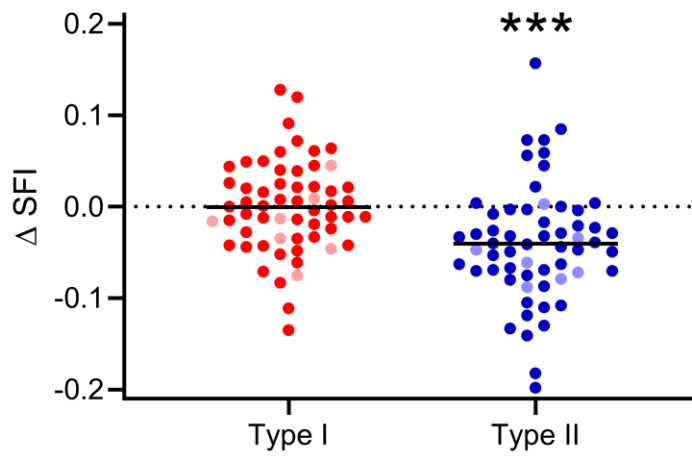

Supplement: JCSM-15-306-s001.pdf [file JCSM-15-306-s001.pdf]
